# Supplementary material for: MPT0G612, a Novel HDAC6 Inhibitor, Induces Apoptosis and Suppresses IFN-γ-Induced Programmed Death-Ligand 1 in Human Colorectal Carcinoma Cells
Source: PubMed Central journal article supplement (PMC6826904; doi:10.3390/cancers11101617), 2019-10-22

Supplementary Materials:

## MPT0G612, a Novel HDAC6 Inhibitor, Induces Apoptosis and Suppresses IFN- $\gamma$ -Induced Programmed Death-Ligand 1 in Human Colorectal Carcinoma Cells

Mei-Chuan Chen, Yu-Chen Lin, Yu-Hsuan Liao, Jing-Ping Liou and Chun-Han Chen

**Table S1.** The GI<sub>50</sub> and IC<sub>50</sub> values of different drugs in HCT116, HT-29 and DLD-1 cells.

| Compound     | HCT116                      |                             | HT-29                       |                             | DLD-1                       |                             |
|--------------|-----------------------------|-----------------------------|-----------------------------|-----------------------------|-----------------------------|-----------------------------|
|              | GI <sub>50</sub> ( $\mu$ M) | IC <sub>50</sub> ( $\mu$ M) | GI <sub>50</sub> ( $\mu$ M) | IC <sub>50</sub> ( $\mu$ M) | GI <sub>50</sub> ( $\mu$ M) | IC <sub>50</sub> ( $\mu$ M) |
| MPT0G612     | 0.5 $\pm$ 0.1               | 1.6 $\pm$ 0.54              | 1.27 $\pm$ 0.16             | 1.97 $\pm$ 0.01             | 2.30 $\pm$ 0.25             | 2.43 $\pm$ 0.06             |
| ACY-1215     | 3.6 $\pm$ 0.3               | 6.3 $\pm$ 0.56              | 5.45 $\pm$ 0.02             | 9.56 $\pm$ 0.75             | > 10                        | >10                         |
| Tubastatin A | 6.8 $\pm$ 1.1               | 9.3 $\pm$ 0.94              | > 10                        | >10                         | > 10                        | >10                         |

**Fig. S1**

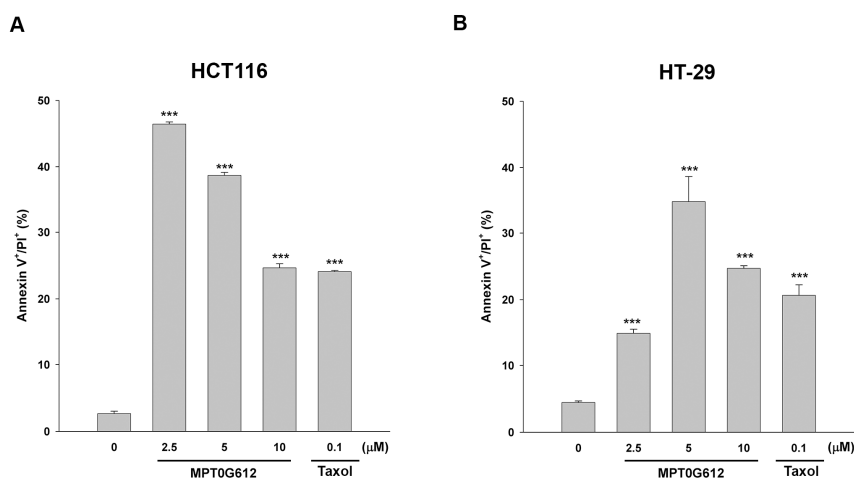

**Figure S1.** Effects of MPT0G612 on apoptosis in CRC cells. HCT116 (A) and HT-29 (B) cells were exposed to indicated concentrations of MPT0G612 for 48h. The cells were then stained with Annexin V-FITC/PI solution and analyzed by flow cytometry. Paclitaxel (Taxol, 0.1  $\mu$ M) was included as a positive control of apoptosis. \*\*\*  $p < 0.001$ .

### Western blots

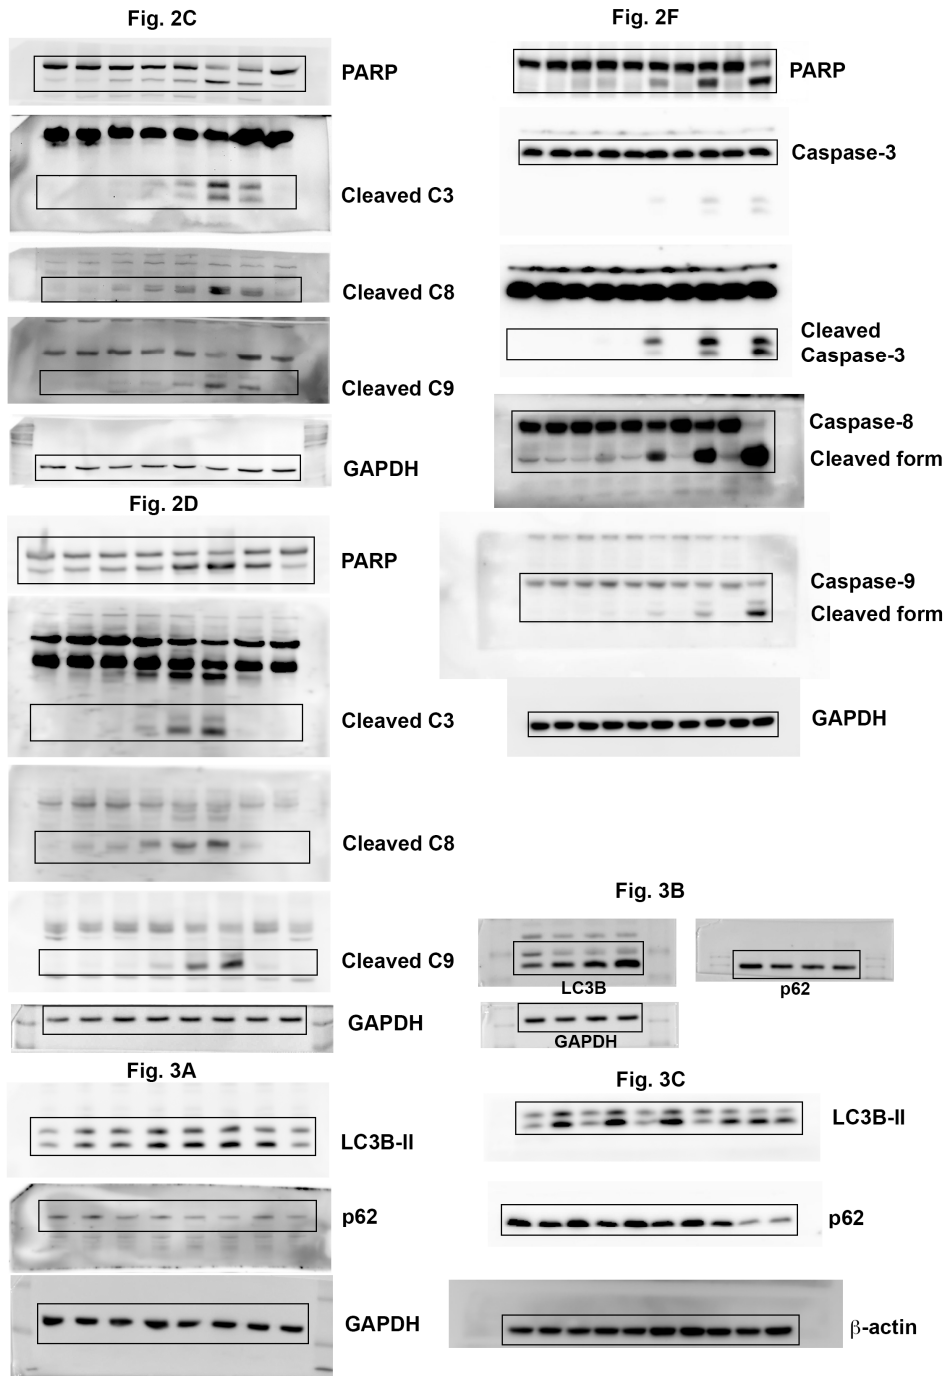

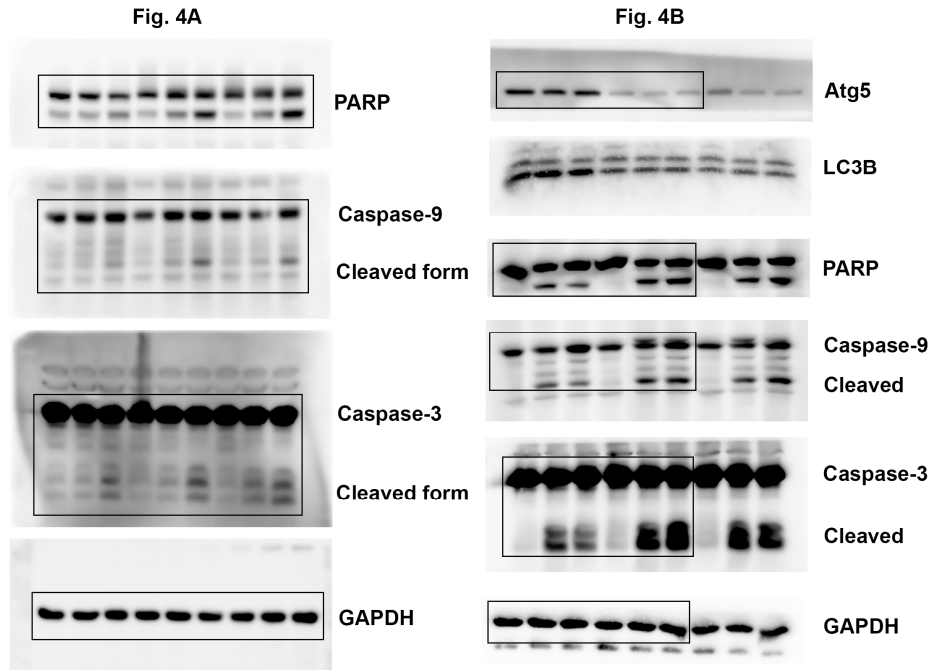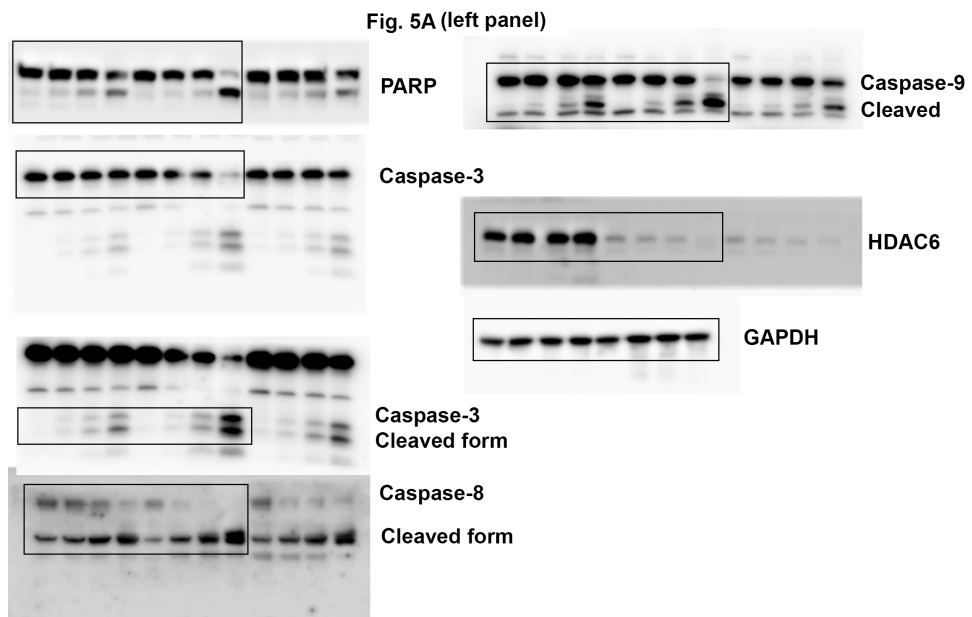

Fig. 5A (right panel)

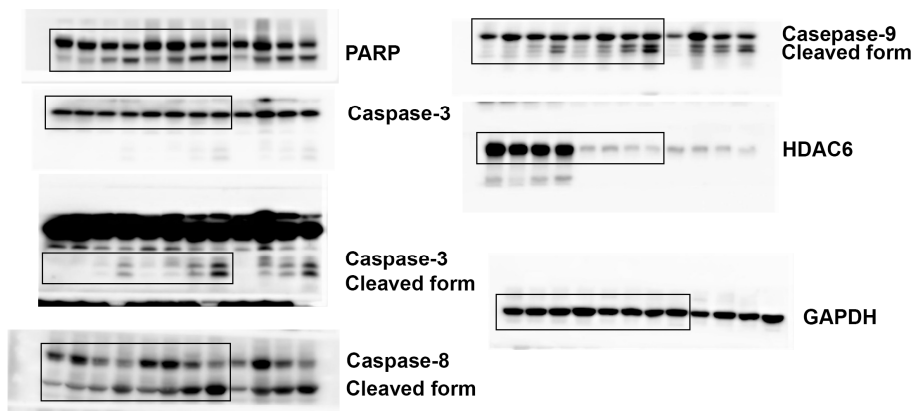

Fig. 5B (left panel)

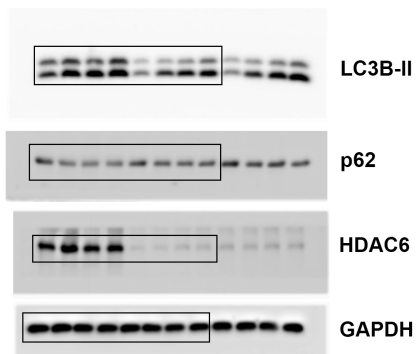

Fig. 5B (right panel)

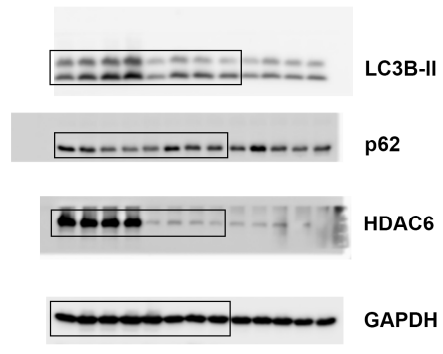

Fig. 6A

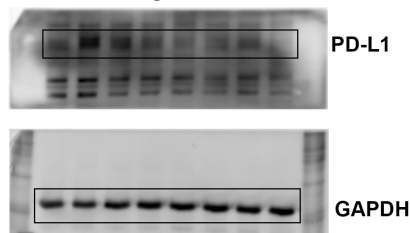

Fig. 6B

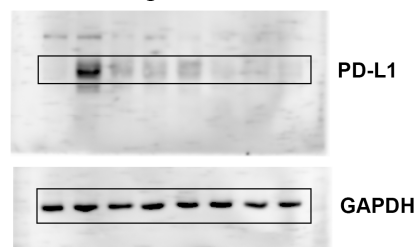

Fig. 6C

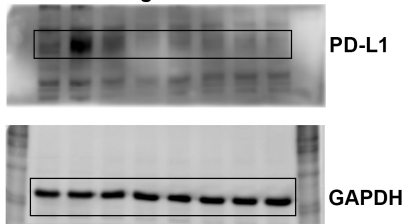

Fig. 6D

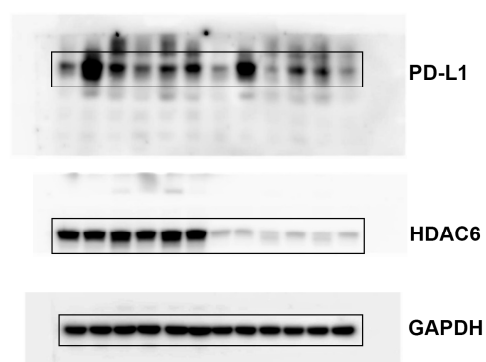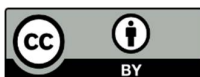

Supplement: cancers-11-01617-s001.pdf [file cancers-11-01617-s001.pdf]
